# Supplementary material for: Natural attenuation processes of arsenic in the groundwater of the Brahmaputra floodplain of Assam, India
Source: Royal Society of Chemistry journal article supplement (doi:10.1039/c5em00401b), 2015-11-12
Supplement: c5em00401b1.pdf [file c5em00401b1.pdf]

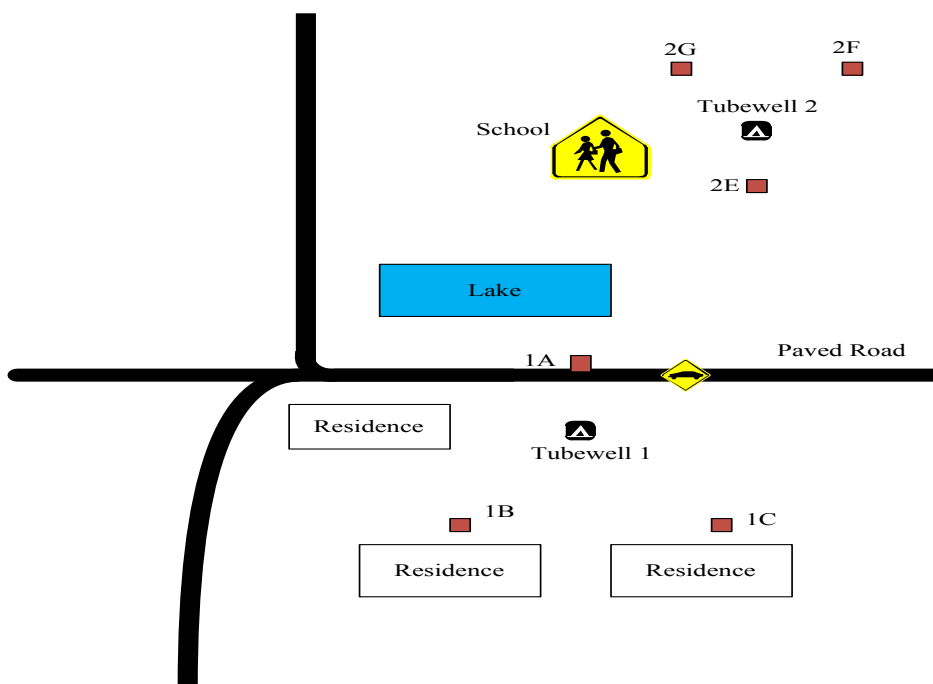

Fig A1: Showing the site location of drilling in higher As contaminated Tube-wells 1 and 2.

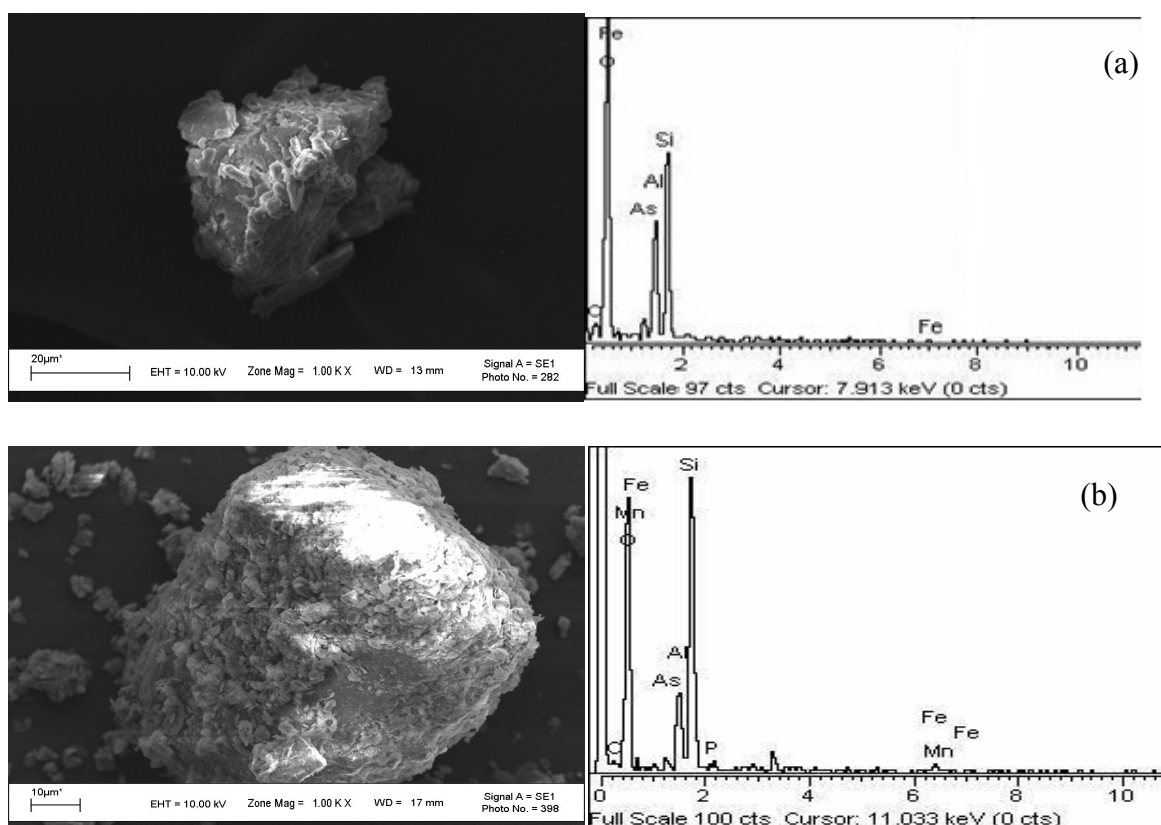

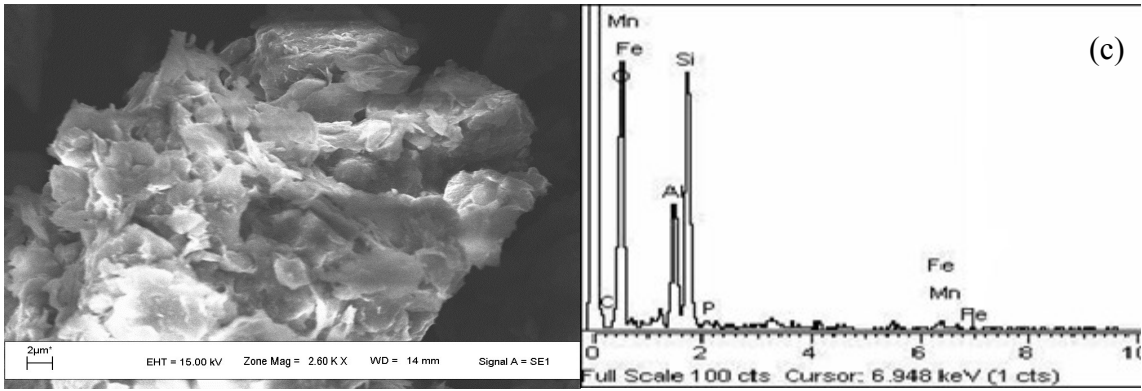

Figure A1. SEM and EDX of soil sediment samples (a) C\_50 (b) C\_70 (c) 1C\_150.

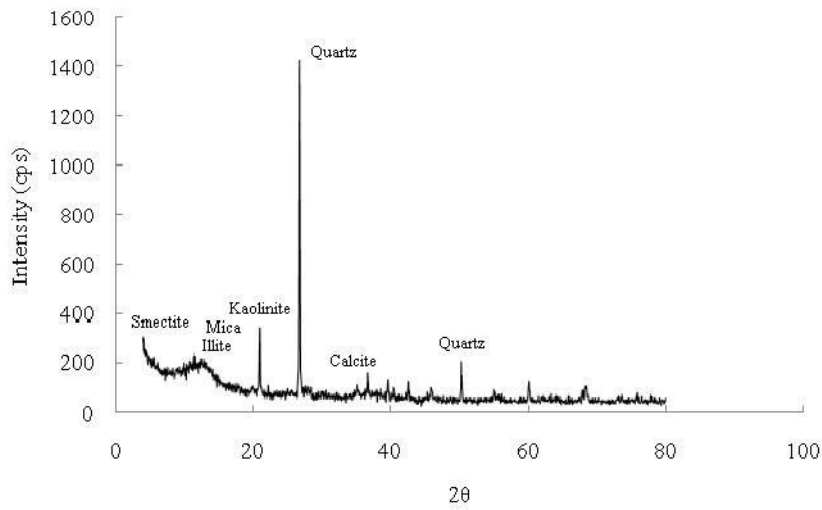

Figure A2. X-Ray Diffraction (XRD) of sediment samples (a) 1C\_50
